# Supplementary material for: How do people perceive different labels for rotator cuff disease? A content analysis of data collected in a randomised controlled experiment
Source: HighWire-hosted journal article supplement (doi:10.1136/bmjopen-2021-052092), 2021-12-01
Supplement: bmjopen-2021-052092supp003_data_supplement.pdf [file bmjopen-2021-052092supp003_data_supplement.pdf]

Supplementary Table 3. Examples of participants' open-ended responses regarding 'words or feelings' (question 1) across labels (top 10 codes only)

| Subacromial impingement syndrome                                                              | Rotator cuff tear                                                     | Bursitis                                                                     | Rotator-cuff-related shoulder pain                                                                                                                        | Shoulder sprain                                                                                           | Episode of shoulder pain                                                                                  |
|-----------------------------------------------------------------------------------------------|-----------------------------------------------------------------------|------------------------------------------------------------------------------|-----------------------------------------------------------------------------------------------------------------------------------------------------------|-----------------------------------------------------------------------------------------------------------|-----------------------------------------------------------------------------------------------------------|
| <b>Pain experience</b>                                                                        |                                                                       |                                                                              |                                                                                                                                                           |                                                                                                           |                                                                                                           |
| "Unbearable pain."<br><i>[P130, Female, age 40]</i>                                           | "Very uncomfortable to have."<br><i>[P329, Female, age 65]</i>        | "Pain in the shoulder area."<br><i>[P520, Male, age 79]</i>                  | "Pain & discomfort."<br><i>[P797, Male, age 69]</i>                                                                                                       | "Tingling, hot sensation, pain on lifting arm up."<br><i>[P1044, Female, age 58]</i>                      | "Aching pain throbbing."<br><i>[P1120, Male, age 34]</i>                                                  |
| "I think that it is pain and very uncomfortable."<br><i>[P121, Male, age 45]</i>              | "Painful, agony."<br><i>[P331, Male, age 49]</i>                      | "Pain, swelling, redness."<br><i>[P559, Female, age 49]</i>                  | "Pain that incurs when moved."<br><i>[P682, Female, age 38]</i>                                                                                           | "Pain in shoulder hurting bad."<br><i>[P869, Male, age 64]</i>                                            | "Very, very sharp pains."<br><i>[P1085, Female, age 32]</i>                                               |
| <b>Tissue damage or dysfunction</b>                                                           |                                                                       |                                                                              |                                                                                                                                                           |                                                                                                           |                                                                                                           |
| "Bones trapping tendons/muscles."<br><i>[P188, Female, age 28]</i>                            | "Shoulder tear that hurts real bad."<br><i>[P236, Female, age 60]</i> | "Fluid sac that is maybe torn or ruptured."<br><i>[P577, Female, age 56]</i> | "An injury to muscles."<br><i>[P821, Female, age 63]</i>                                                                                                  | "A muscle sprain or pinched nerve."<br><i>[P922, Male, age 65]</i>                                        | "I think if things like a trapped nerve or general injury to the area."<br><i>[P1259, Female, age 41]</i> |
| "Something pressing in the shoulder. Seizing and/or swelling."<br><i>[P208, Male, age 38]</i> | "I have tendon damage."<br><i>[P341, Male, age 48]</i>                | "Inflammation in the shoulder."<br><i>[P533, Male, age 45]</i>               | "Sounds like it is in the area of the shoulder joint. Makes me think there is inflammation or perhaps a pinched nerve."<br><i>[P1080, Female, age 69]</i> | "You didn't break anything you just sprained the ligaments or muscles."<br><i>[P1080, Female, age 69]</i> | "Tendon, muscle and all this other pain."<br><i>[P1129, Male, age 26]</i>                                 |

|                                                                                                                                                                                                              |                                                                                                                                                     |                                                                                                                                                                         |                                                                                                                                                                                                                            |                                                                                                                                                                                                          |                                                                                                                                                                                                 |
|--------------------------------------------------------------------------------------------------------------------------------------------------------------------------------------------------------------|-----------------------------------------------------------------------------------------------------------------------------------------------------|-------------------------------------------------------------------------------------------------------------------------------------------------------------------------|----------------------------------------------------------------------------------------------------------------------------------------------------------------------------------------------------------------------------|----------------------------------------------------------------------------------------------------------------------------------------------------------------------------------------------------------|-------------------------------------------------------------------------------------------------------------------------------------------------------------------------------------------------|
|                                                                                                                                                                                                              |                                                                                                                                                     |                                                                                                                                                                         | [P837, Male, age 61]                                                                                                                                                                                                       |                                                                                                                                                                                                          |                                                                                                                                                                                                 |
| <b>Activity restriction</b>                                                                                                                                                                                  |                                                                                                                                                     |                                                                                                                                                                         |                                                                                                                                                                                                                            |                                                                                                                                                                                                          |                                                                                                                                                                                                 |
| <p>“Pain, being uncomfortable, not being able to do the things you normally do.”</p> <p>[P200, Female, age 63]</p> <p>“Disability, not being able to work or do activities.”</p> <p>[P106, Male, age 21]</p> | <p>“I’m useless on one side.”</p> <p>[P243, Male, age 58]</p> <p>“It’s painful and hard to function day to day.”</p> <p>[P267, Female, age 39]</p>  | <p>“Pain and trouble with movement.”</p> <p>[P593, Male, age 42]</p> <p>“Inflammation, pain, decrease range of motion.”</p> <p>[P569, Female, age 30]</p>               | <p>“Something painful they may limit the ability to move your arm in the way you are accustomed to doing things.”</p> <p>[P792, Female, age 63]</p> <p>“Annoying restriction to movement.”</p> <p>[P866, Male, age 66]</p> | <p>“Limited movement.”</p> <p>[P960, Female, age 67]</p> <p>“Take more care in the things I do.”</p> <p>[P1054, Male, age 60]</p>                                                                        | <p>“Affects my everyday actions”</p> <p>[P1189, Male, age 68]</p> <p>“Hard to do normal things”</p> <p>[P1294, Female, age 68]</p>                                                              |
| <b>Psychological distress</b>                                                                                                                                                                                |                                                                                                                                                     |                                                                                                                                                                         |                                                                                                                                                                                                                            |                                                                                                                                                                                                          |                                                                                                                                                                                                 |
| <p>“Pain, stress, anxious.”</p> <p>[P25, Male, age 64]</p> <p>“Pinched nerve, sounds scary.”</p> <p>[P145, Female, age 45]</p>                                                                               | <p>“Bad feeling, is very not cool.”</p> <p>[P238, Male, age 38]</p> <p>“The term rotator cuff tear sounds scary.”</p> <p>[P256, Female, age 29]</p> | <p>“A little scared, because if you don't get it fixed right away, it'll cause stiff shoulder disease.”</p> <p>[P564, Male, age 34]</p> <p>“It sounds quite scary.”</p> | <p>“Scared - what if I lose use of my shoulder?”</p> <p>[P741, Female, age 37]</p> <p>“Makes me worried.”</p> <p>[P701, Male, age 38]</p>                                                                                  | <p>“That I am getting weaker. To sprain my shoulder whilst doing a simple task worries me a little.”</p> <p>[P1050, Female, age 62]</p> <p>“Scarred, worried, confused.”</p> <p>[P985, Male, age 19]</p> | <p>“That my body might possibly be deteriorating, perhaps seriously. I would be quite concerned. Anxious, worried.”</p> <p>[P1218, Male, age 47]</p> <p>“Anxious, teary, worried, troubled”</p> |

|                                                                                                                                                                                                     |                                                                                                                                                                                                                             |                                                                                                                                                                                 |                                                                                                                                                                                                                         |                                                                                                                                                                                                                                              |                                                                                                                                                                                                                         |
|-----------------------------------------------------------------------------------------------------------------------------------------------------------------------------------------------------|-----------------------------------------------------------------------------------------------------------------------------------------------------------------------------------------------------------------------------|---------------------------------------------------------------------------------------------------------------------------------------------------------------------------------|-------------------------------------------------------------------------------------------------------------------------------------------------------------------------------------------------------------------------|----------------------------------------------------------------------------------------------------------------------------------------------------------------------------------------------------------------------------------------------|-------------------------------------------------------------------------------------------------------------------------------------------------------------------------------------------------------------------------|
|                                                                                                                                                                                                     |                                                                                                                                                                                                                             | <i>[P445, Female, age 46]</i>                                                                                                                                                   |                                                                                                                                                                                                                         |                                                                                                                                                                                                                                              | <i>[P1088, Female, age 62]</i>                                                                                                                                                                                          |
| <b>Good prognosis</b>                                                                                                                                                                               |                                                                                                                                                                                                                             |                                                                                                                                                                                 |                                                                                                                                                                                                                         |                                                                                                                                                                                                                                              |                                                                                                                                                                                                                         |
| <p>“Pain which will subside with time. Healing over time if care taken.”</p> <p><i>[P134, Male, age 69]</i></p> <p>“Temporary pain in the shoulder blade.”</p> <p><i>[P166, Female, age 28]</i></p> | <p>“It just needs time to repair itself.”</p> <p><i>[P407, Female, age 64]</i></p> <p>“It sounds threatening, but I am sure this can be recovered during reasonable period of time.”</p> <p><i>[P395, Male, age 45]</i></p> | <p>“Inflammation. Pain eventual recovery.”</p> <p><i>[P532, Female, age 57]</i></p> <p>“Temporary shoulder pain that will just go away.”</p> <p><i>[P602, Male, age 47]</i></p> | <p>“Great now but with the time it cures and no need of doing anything let time show magic.”</p> <p><i>[P730, Male, age 33]</i></p> <p>“Not serious, will heal itself, relax.”</p> <p><i>[P745, Female, age 65]</i></p> | <p>“Strain which eventually will heal itself.”</p> <p><i>[P1040, Male, age 79]</i></p> <p>“Temporary pain from something strenuous I tried to do.”</p> <p><i>[P1067, Female, age 69]</i></p>                                                 | <p>“Temporary. Not very serious. Annoying.”</p> <p><i>[P1271, Female, age 36]</i></p> <p>“Short term pain”</p> <p><i>[P1273, Male, age 47]</i></p>                                                                      |
| <b>Uncertainty</b>                                                                                                                                                                                  |                                                                                                                                                                                                                             |                                                                                                                                                                                 |                                                                                                                                                                                                                         |                                                                                                                                                                                                                                              |                                                                                                                                                                                                                         |
| <p>“What the hell is that? Can't they speak in simple terms?”</p> <p><i>[P129, Male, age 61]</i></p> <p>“Complicated, serious, nervous.”</p> <p><i>[P114, Female, age 32]</i></p>                   | <p>“I am not sure actually about this except that fact that it is related to shoulder.”</p> <p><i>[P272, Female, age 34]</i></p> <p>“Pain, uncertainty.”</p> <p><i>[P378, Male, age 68]</i></p>                             | <p>“No idea, something common.”</p> <p><i>[P565, Male, age 47]</i></p> <p>“Do not know what it is.”</p> <p><i>[P627, Female, age 40]</i></p>                                    | <p>“It sounds complicated.”</p> <p><i>[P858, Female, age 71]</i></p> <p>“Not sure what to do at all very sorry but I will go to the therapy.”</p> <p><i>[P662, Male, age 49]</i></p>                                    | <p>“Scarred, worried, confused.”</p> <p><i>[P985, Male, age 19]</i></p> <p>“Honestly it first time I see this world and really I can't guess what it is but it still doesn't mean a serious issue.”</p> <p><i>[P955, Female, age 41]</i></p> | <p>“Episode of shoulder pain is too vague of a term. When I hear it, I want more definitive answers and diagnostic.”</p> <p><i>[P1144, Male, age 25]</i></p> <p>“Does not give a good cause, not a very good name.”</p> |

|                                                                                                                                                                                                                                     |                                                                                                                                                                                                                      |                                                                                                                                                                                                                                             |                                                                                                                                                                        |                                                                                                                                                                                                                  |                                                                                                                                                                                                                                                                                          |
|-------------------------------------------------------------------------------------------------------------------------------------------------------------------------------------------------------------------------------------|----------------------------------------------------------------------------------------------------------------------------------------------------------------------------------------------------------------------|---------------------------------------------------------------------------------------------------------------------------------------------------------------------------------------------------------------------------------------------|------------------------------------------------------------------------------------------------------------------------------------------------------------------------|------------------------------------------------------------------------------------------------------------------------------------------------------------------------------------------------------------------|------------------------------------------------------------------------------------------------------------------------------------------------------------------------------------------------------------------------------------------------------------------------------------------|
|                                                                                                                                                                                                                                     |                                                                                                                                                                                                                      |                                                                                                                                                                                                                                             |                                                                                                                                                                        |                                                                                                                                                                                                                  | <i>[P1210, Female, age 36]</i>                                                                                                                                                                                                                                                           |
| <b>Minor issue</b>                                                                                                                                                                                                                  |                                                                                                                                                                                                                      |                                                                                                                                                                                                                                             |                                                                                                                                                                        |                                                                                                                                                                                                                  |                                                                                                                                                                                                                                                                                          |
| <p>“The injury is probably just due to overextending my arm, it is not too serious and should get better.”</p> <p><i>[P180, Female, age 38]</i></p> <p>“Not sure maybe a slight disorder.”</p> <p><i>[P113, Female, age 20]</i></p> | <p>“Shoulder pain in the short-term mild discomfort.”</p> <p><i>[P405, Male, age 51]</i></p> <p>“This is not a serious medical condition. I will recover reasonably soon.”</p> <p><i>[P399, Female, age, 41]</i></p> | <p>“Words and feelings that come to mind is not to worry.”</p> <p><i>[P640, Female, age 24]</i></p> <p>“Not as bad as it could have been.”</p> <p><i>[P498, Male, age 44]</i></p>                                                           | <p>“Simple pain, no injury.”</p> <p><i>[P775, Male, age 21]</i></p> <p>“Painful but not serious.”</p> <p><i>[P820, Female, age 36]</i></p>                             | <p>“That it is nothing too serious, just needs rest and gentle exercise.”</p> <p><i>[P1073, Male, age 75]</i></p> <p>“Temporary, not serious, will improve with time.”</p> <p><i>[P1051, Female, age 67]</i></p> | <p>“A minor injury with some discomfort</p> <p><i>[P1231, Male, age 61]</i></p> <p>“Will not stay long. Will cures by itself and no need for medicine”</p> <p><i>[P1249, Female, age, 47]</i></p>                                                                                        |
| <b>Treatment/investigation</b>                                                                                                                                                                                                      |                                                                                                                                                                                                                      |                                                                                                                                                                                                                                             |                                                                                                                                                                        |                                                                                                                                                                                                                  |                                                                                                                                                                                                                                                                                          |
| <p>“It is pretty serious I may need surgery.”</p> <p><i>[P129, Male, age 61]</i></p> <p>“It sounds like a serious condition and I thought that surgery is require to fix it.”</p> <p><i>[P51, Female, age 31]</i></p>               | <p>“Pain, off work, surgery.”</p> <p><i>[P420, Male, age 36]</i></p> <p>“Shoulder, muscle, surgery, orthopaedics, throwing.”</p> <p><i>[P308, Female, age 23]</i></p>                                                | <p>“Infection or inflammation that can be treated.”</p> <p><i>[P635, Female, age 62]</i></p> <p>“A little scared, because if you don't get it fixed right away, it'll cause stiff shoulder disease.”</p> <p><i>[P564, Male, age 34]</i></p> | <p>“Need to attend very quickly.”</p> <p><i>[P774, Male, age 38]</i></p> <p>“Long term discomfort, need for exercise regime.”</p> <p><i>[P790, Female, age 76]</i></p> | <p>“Pain, doctors, sling, X-rays, medication.”</p> <p><i>[P910, Female, age 44]</i></p> <p>“Damn, now I have to go through physical therapy.”</p> <p><i>[P890, Male, age 21]</i></p>                             | <p>“If it persisted for some time, I would visit a doctor and go from there.”</p> <p><i>[P1296, Male, age 66]</i></p> <p>“It makes me realise that my health professional should point me in the right direction to enable me to help myself.”</p> <p><i>[P1209, Female, age 71]</i></p> |

| <b>Unhappy/frustration</b>                                       |                                                                                                                                      |                                                                                                |                                                                                                                           |                                                                                                                                                  |                                                                                                    |
|------------------------------------------------------------------|--------------------------------------------------------------------------------------------------------------------------------------|------------------------------------------------------------------------------------------------|---------------------------------------------------------------------------------------------------------------------------|--------------------------------------------------------------------------------------------------------------------------------------------------|----------------------------------------------------------------------------------------------------|
| "Fear, anxious, angry, tired."<br><i>[P30, Male, age 35]</i>     | "Disgusting pain, unhappy, sad, mad."<br><i>[P300, Male, age 23]</i>                                                                 | "Fear, hurt, angry."<br><i>[P446, Male, age 23]</i>                                            | "Frustrated, annoyed, anxious, nervous."<br><i>[P663, Male, age 20]</i>                                                   | "Frustrated, tired."<br><i>[P966, Female, 47]</i>                                                                                                | "Painful, tiredness, unhappy"<br><i>[P1305, Female, age 56]</i>                                    |
| "Sad, living in pain isn't fun."<br><i>[P87, Female, age 47]</i> | "Causing me to be unhappy when I cannot reach. Causing me to be unhappy when I cannot carry items."<br><i>[P351, Female, age 71]</i> | "Pain, stress, anger."<br><i>[P452, Female, 42]</i>                                            | "Muscular, hurts more when I try and sleep, frustrating, can't do my normal activities."<br><i>[P796, Female, age 53]</i> | "Limitations, pain, frustration."<br><i>[P899, Male, age 23]</i>                                                                                 | "Pissed off anxious and angry"<br><i>[P1133, Male, age 33]</i>                                     |
| <b>Serious issue</b>                                             |                                                                                                                                      |                                                                                                |                                                                                                                           |                                                                                                                                                  |                                                                                                    |
| "It sounds scary and serious."<br><i>[P95, Female, age 54]</i>   | "Serious condition."<br><i>[P301, Female, age 65]</i>                                                                                | "Serious condition, something has burst, worried."<br><i>[P620, Female, age 33]</i>            | "Serious, long term injury."<br><i>[P826, Female, age 38]</i>                                                             | "It's really bad because the stress is here, you think like you got something anywhere else that's more serious."<br><i>[P875, Male, age 25]</i> | "That my body might possibly be deteriorating, perhaps seriously."<br><i>[P1218, Male, age 47]</i> |
| "Sounds like very serious injury."<br><i>[P58, Male, age 39]</i> | "It sounds very serious."<br><i>[P268, Male, age 25]</i>                                                                             | "Inflamed area within the body that could harm the human body."<br><i>[P506, Male, age 49]</i> | "Sounds bad and sounds like it would hurt a lot and might need surgery to fix."<br><i>[P695, Male, age 45]</i>            | "It could be cancer."<br><i>[P1066, Female, age 46]</i>                                                                                          | "Hurt, shoulder, arm, cancer"<br><i>[P1213, Prefer not to say gender, age 26]</i>                  |

P: participant.
