# Supplementary material for: How do people perceive different labels for rotator cuff disease? A content analysis of data collected in a randomised controlled experiment
Source: HighWire-hosted journal article supplement (doi:10.1136/bmjopen-2021-052092), 2021-12-01
Supplement: bmjopen-2021-052092supp004_data_supplement.pdf [file bmjopen-2021-052092supp004_data_supplement.pdf]

Supplementary Table 4. All treatment themes across labels

| Subacromial impingement syndrome (n=214) |            | Rotator cuff tear (n=210)                 |            | Bursitis (n=225)                          |            | Rotator-cuff-related shoulder pain (n=218) |            | Shoulder sprain (n=217)                   |            | Episode of shoulder pain (n=224)          |            |
|------------------------------------------|------------|-------------------------------------------|------------|-------------------------------------------|------------|--------------------------------------------|------------|-------------------------------------------|------------|-------------------------------------------|------------|
| Theme                                    | N (%)      | Theme                                     | N (%)      | Theme                                     | N (%)      | Theme                                      | N (%)      | Theme                                     | N (%)      | Theme                                     | N (%)      |
| Rest                                     | 59 (27.6%) | Physiotherapy                             | 49 (23.3%) | Medication                                | 69 (30.7%) | Medication                                 | 61 (28.0%) | Medication                                | 71 (32.7%) | Medication                                | 83 (37.1%) |
| Physiotherapy                            | 51 (23.8%) | Rest                                      | 47 (22.4%) | Rest                                      | 63 (28.0%) | Physiotherapy                              | 52 (23.9%) | Rest                                      | 55 (25.3%) | Physiotherapy                             | 56 (25.0%) |
| Medication                               | 48 (22.4%) | Surgery                                   | 40 (19.0%) | Activity modification                     | 31 (13.8%) | Surgery                                    | 40 (18.3%) | Physiotherapy                             | 43 (19.8%) | Rest                                      | 42 (18.8%) |
| Activity modification                    | 38 (17.8%) | Medication                                | 36 (17.1%) | Exercise                                  | 31 (13.8%) | Exercise                                   | 34 (15.6%) | Exercise                                  | 43 (19.8%) | Exercise                                  | 34 (15.2%) |
|                                          |            | Activity modification                     | 30 (14.3%) | <i>Exercise (intensity not specified)</i> | 16 (7.1%)  | <i>Exercise (intensity not specified)</i>  | 25 (11.5%) | <i>Exercise (intensity not specified)</i> | 32 (14.7%) | <i>Exercise (intensity not specified)</i> | 19 (8.5%)  |
| Injection                                | 25 (11.7%) | Exercise                                  | 26 (12.4%) | <i>Light exercise</i>                     | 15 (6.7%)  | <i>Light exercise</i>                      | 9 (4.1%)   | <i>Light exercise</i>                     | 11 (5.1%)  | <i>Light exercise</i>                     | 15 (6.7%)  |
| Exercise                                 | 25 (11.7%) | <i>Exercise (intensity not specified)</i> | 15 (7.1%)  | Physiotherapy                             | 30 (13.3%) | Rest                                       | 34 (15.6%) | Heat                                      | 33 (15.2%) | Heat                                      | 24 (10.7%) |
| <i>Light exercise</i>                    | 6 (2.8%)   | <i>Light exercise</i>                     | 11 (5.2%)  | Injection                                 | 22 (9.8%)  | Activity modification                      | 19 (8.7%)  | Cold                                      | 25 (11.5%) | Massage                                   | 22 (9.8%)  |
| Surgery                                  | 21 (9.8%)  | Heat                                      | 16 (7.6%)  | Heat                                      | 20 (8.9%)  | Injection                                  | 16 (7.3%)  | Activity modification                     | 20 (9.2%)  | Injection                                 | 21 (9.4%)  |
| Unsure                                   | 17 (7.9%)  | Unsure                                    | 16 (7.6%)  | Cold                                      | 18 (8.0%)  | Investigations                             | 16 (7.3%)  | Massage                                   | 17 (7.8%)  | Investigations                            | 20 (8.9%)  |
| Heat                                     | 14 (6.5%)  | Wait and see                              | 13 (6.2%)  | Normal movements                          | 16 (7.1%)  | Irrelevant response                        | 12 (5.5%)  | Surgery                                   | 16 (7.4%)  | Activity modification                     | 18 (8.0%)  |
| Doctor                                   | 12 (5.6%)  | Injection                                 | 12 (5.7%)  | Unsure                                    | 15 (6.7%)  | Chiropractor                               | 11 (5.0%)  | Injection                                 | 14 (6.5%)  | Cold                                      | 18 (8.0%)  |
| Massage                                  | 12 (5.6%)  | Massage                                   | 10 (4.8%)  | Doctor                                    | 13 (5.8%)  | Massage                                    | 11 (5.0%)  | Topical treatments                        | 14 (6.5%)  | Doctor                                    | 14 (6.3%)  |
| Cold                                     | 10 (4.7%)  | Investigations                            | 9 (4.3%)   | Massage                                   | 11 (4.9%)  | No treatment                               | 11 (5.0%)  | Doctor                                    | 12 (5.5%)  | Topical treatments                        | 14 (6.3%)  |
| Normal movements                         | 9 (4.2%)   | No treatment                              | 8 (3.8%)   | Surgery                                   | 11 (4.9%)  | Heat                                       | 10 (4.6%)  | Unsure                                    | 11 (5.1%)  | Surgery                                   | 13 (5.8%)  |
| Investigations                           | 7 (3.3%)   | Normal movements                          | 8 (3.8%)   | No treatment                              | 9 (4.0%)   | Cold                                       | 9 (4.1%)   | Investigations                            | 10 (4.6%)  | No treatment                              | 8 (3.6%)   |
| No treatment                             | 7 (3.3%)   | Topical treatments                        | 7 (3.3%)   | Investigations                            | 7 (3.1%)   | Normal movements                           | 9 (4.1%)   | Chiropractor                              | 6 (2.8%)   | Acupuncture                               | 7 (3.1%)   |
| Topical treatments                       | 6 (2.8%)   | Cold                                      | 6 (2.9%)   | Wait and see                              | 6 (2.7%)   | Topical treatments                         | 9 (4.1%)   | Immobilisation                            | 6 (2.8%)   | Chiropractor                              | 6 (2.7%)   |

|                               |          |                               |          |                               |          |                              |          |                               |          |                               |          |
|-------------------------------|----------|-------------------------------|----------|-------------------------------|----------|------------------------------|----------|-------------------------------|----------|-------------------------------|----------|
| Wait and see                  | 6 (2.8%) | Acupuncture                   | 5 (2.4%) | Specialist                    | 5 (2.2%) | Unsure                       | 9 (4.1%) | Irrelevant response           | 6 (2.8%) | Normal movements              | 6 (2.7%) |
| Acupuncture                   | 4 (1.9%) | Doctor                        | 5 (2.4%) | Topical treatments            | 5 (2.2%) | Doctor                       | 5 (2.3%) | Normal movements              | 6 (2.8%) | Unsure                        | 6 (2.7%) |
| Hydrotherapy                  | 4 (1.9%) | Irrelevant response           | 5 (2.4%) | Electrotherapy                | 4 (1.8%) | Wait and see                 | 5 (2.3%) | No treatment                  | 5 (2.3%) | Irrelevant response           | 5 (2.2%) |
| Irrelevant response           | 4 (1.9%) | Specialist                    | 5 (2.4%) | Chiropractor                  | 3 (1.3%) | Acupuncture                  | 3 (1.4%) | Wait and see                  | 5 (2.3%) | Immobilisation                | 4 (1.8%) |
| Specialist                    | 2 (0.9%) | Taping/bracing                | 5 (2.4%) | Hydrotherapy                  | 3 (1.3%) | Taping/bracing               | 3 (1.4%) | Compression                   | 3 (1.4%) | Diet                          | 3 (1.3%) |
| Chiropractor                  | 1 (0.5%) | Immobilisation                | 4 (1.9%) | Irrelevant response           | 3 (1.3%) | Diet                         | 1 (0.5%) | Natural or unknown therapies  | 3 (1.4%) | Manipulation                  | 2 (0.9%) |
| Compression                   | 1 (0.5%) | Chiropractor                  | 2 (1.0%) | Natural or unknown therapies  | 3 (1.3%) | Hydrotherapy                 | 1 (0.5%) | Acupuncture                   | 2 (0.9%) | Second opinion                | 2 (0.9%) |
| Ergonomics/posture            | 1 (0.5%) | Compression                   | 2 (1.0%) | Prayer/hope/meditation        | 2 (0.9%) | Immobilisation               | 1 (0.5%) | Elevation                     | 2 (0.9%) | Wait and see                  | 2 (0.9%) |
| Good mattress                 | 1 (0.5%) | Diet                          | 2 (1.0%) | Taping/bracing                | 2 (0.9%) | Manipulation                 | 1 (0.5%) | Taping/bracing                | 2 (0.9%) | Natural or unknown therapies  | 1 (0.4%) |
| Natural or unknown therapies  | 1 (0.5%) | Time off work                 | 2 (1.0%) | Time off work                 | 2 (0.9%) | Pain clinic                  | 1 (0.5%) | Electrotherapy                | 1 (0.5%) | Osteopathy                    | 1 (0.4%) |
| Taping/bracing                | 1 (0.5%) | Cognitive behavioural therapy | 1 (0.5%) | Acupuncture                   | 1 (0.4%) | Natural or unknown therapies | 1 (0.5%) | Emergency department/hospital | 1 (0.5%) | Prayer/hope/meditation        | 1 (0.4%) |
| Time off work                 | 1 (0.5%) | Manipulation                  | 1 (0.5%) | Compression                   | 1 (0.4%) | Osteopathy                   | 1 (0.5%) | Ergonomics/posture            | 1 (0.5%) | Specialist                    | 1 (0.4%) |
| Cognitive behavioural therapy | 0 (0.0%) | Second opinion                | 1 (0.5%) | Elevation                     | 1 (0.4%) | Prayer/hope/meditation       | 1 (0.5%) | Hydrotherapy                  | 1 (0.5%) | Taping/bracing                | 1 (0.4%) |
| Diet                          | 0 (0.0%) | Electrotherapy                | 0 (0.0%) | Emergency department/hospital | 1 (0.4%) | Second opinion               | 1 (0.5%) | Manipulation                  | 1 (0.5%) | Stay healthy                  | 1 (0.4%) |
| Electrotherapy                | 0 (0.0%) | Elevation                     | 0 (0.0%) | Ergonomics/posture            | 1 (0.4%) | Specialist                   | 1 (0.5%) | Prayer/hope/meditation        | 1 (0.5%) | Cognitive behavioural therapy | 0 (0.0%) |
| Elevation                     | 0 (0.0%) | Emergency department/hospital | 0 (0.0%) | Immobilisation                | 1 (0.4%) | Time off work                | 1 (0.5%) | Specialist                    | 1 (0.5%) | Compression                   | 0 (0.0%) |

|                               |          |                              |          |                               |          |                               |          |                               |          |                               |          |
|-------------------------------|----------|------------------------------|----------|-------------------------------|----------|-------------------------------|----------|-------------------------------|----------|-------------------------------|----------|
| Emergency department/hospital | 0 (0.0%) | Ergonomics/posture           | 0 (0.0%) | Osteopathy                    | 1 (0.4%) | Cognitive behavioural therapy | 0 (0.0%) | Time off work                 | 1 (0.5%) | Electrotherapy                | 0 (0.0%) |
| Immobilisation                | 0 (0.0%) | Good mattress                | 0 (0.0%) | Stay healthy                  | 1 (0.4%) | Compression                   | 0 (0.0%) | Stay healthy                  | 1 (0.5%) | Elevation                     | 0 (0.0%) |
| Manipulation                  | 0 (0.0%) | Hydrotherapy                 | 0 (0.0%) | Cognitive behavioural therapy | 0 (0.0%) | Electrotherapy                | 0 (0.0%) | Cognitive behavioural therapy | 0 (0.0%) | Emergency department/hospital | 0 (0.0%) |
| Pain clinic                   | 0 (0.0%) | Pain clinic                  | 0 (0.0%) | Diet                          | 0 (0.0%) | Elevation                     | 0 (0.0%) | Diet                          | 0 (0.0%) | Ergonomics/posture            | 0 (0.0%) |
| Osteopathy                    | 0 (0.0%) | Natural or unknown therapies | 0 (0.0%) | Good mattress                 | 0 (0.0%) | Emergency department/hospital | 0 (0.0%) | Good mattress                 | 0 (0.0%) | Good mattress                 | 0 (0.0%) |
| Prayer/hope/meditation        | 0 (0.0%) | Osteopathy                   | 0 (0.0%) | Manipulation                  | 0 (0.0%) | Ergonomics/posture            | 0 (0.0%) | Pain clinic                   | 0 (0.0%) | Hydrotherapy                  | 0 (0.0%) |
| Second opinion                | 0 (0.0%) | Prayer/hope/meditation       | 0 (0.0%) | Pain clinic                   | 0 (0.0%) | Good mattress                 | 0 (0.0%) | Osteopathy                    | 0 (0.0%) | Pain clinic                   | 0 (0.0%) |
| Stay healthy                  | 0 (0.0%) | Stay healthy                 | 0 (0.0%) | Second opinion                | 0 (0.0%) | Stay healthy                  | 0 (0.0%) | Second opinion                | 0 (0.0%) | Time off work                 | 0 (0.0%) |

N: number of participants.
